# Supplementary material
Source: publisher site journal article supplement (https://www.dovepress.com/article/342614)
Supplement: Supplementary file 1 [file get_supplementary_file.php]

**Supporting information**


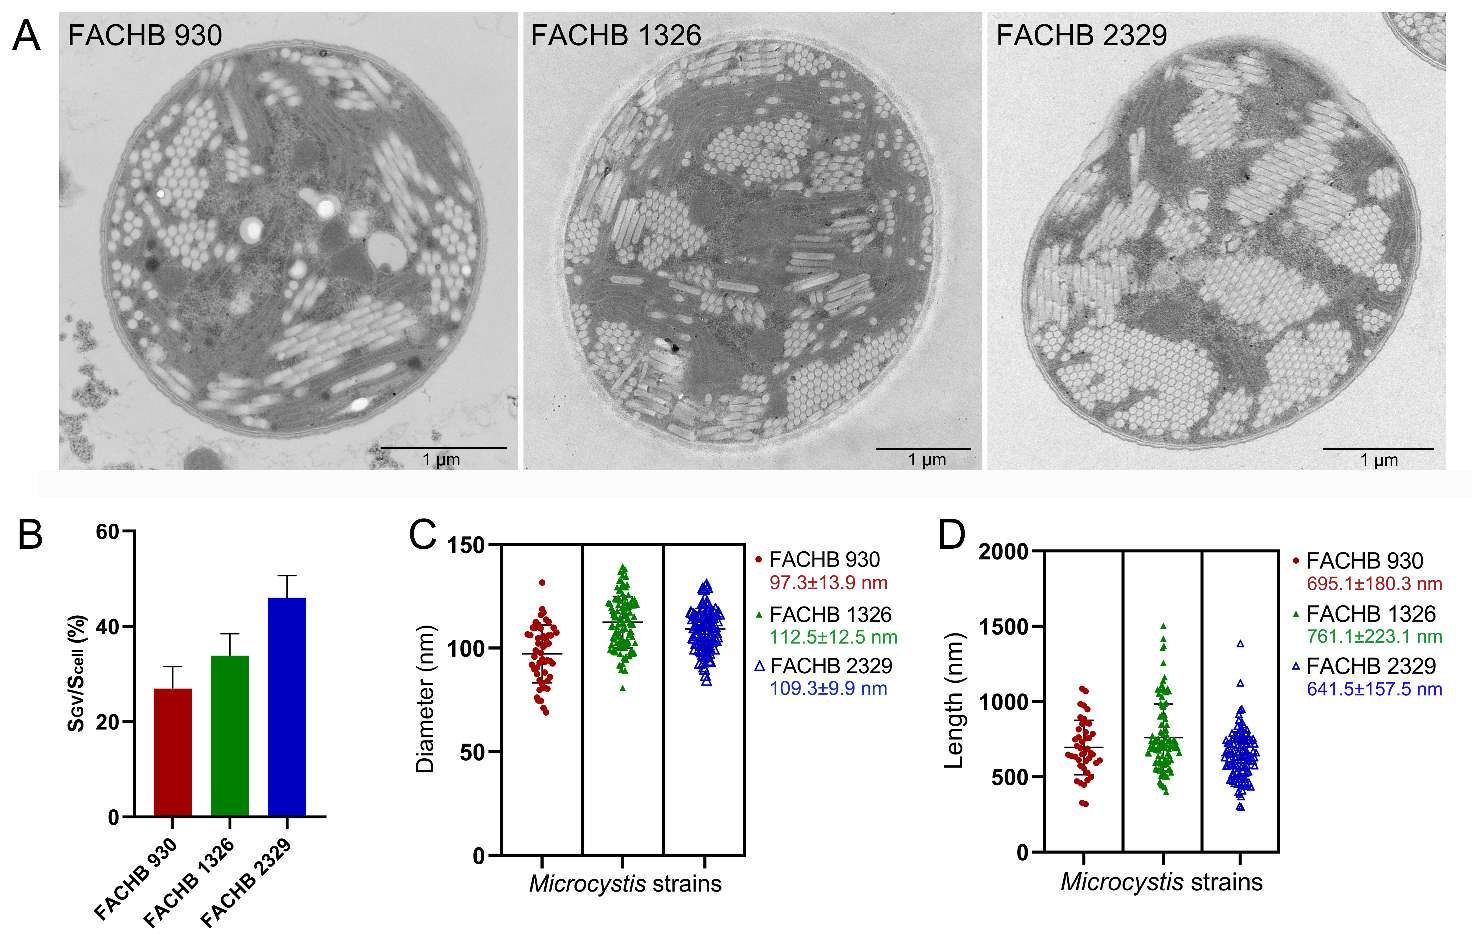


**sFigure 1. Comparison of GV content and size among the three different *Microcystis* strains.** A: Transmission electron microscopy sections of *Microcystis* strains FACHB930, FACHB1326 and FACHB2329. B: In the sections of the three *Microcystis* cells, the percentage GV area to the total cell area was measured. C: The diameter distribution of the purified GVs from these three strains. D: The length distribution of the purified GVs from these three strains.


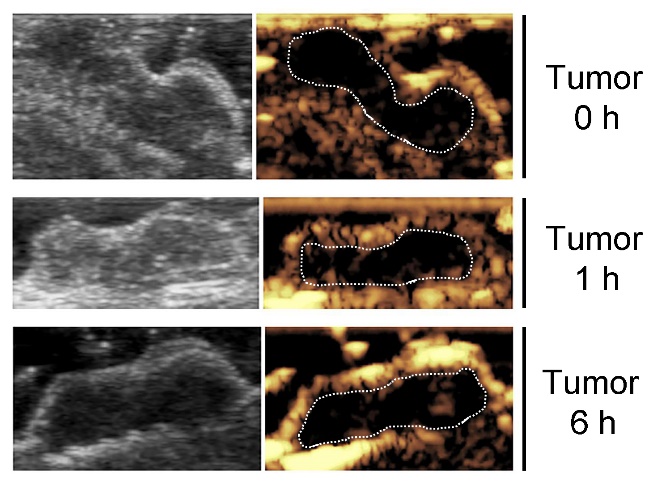


**sFigure 2. The contrast signal could barely be detected in the tumor after a short time (0 hour, 1 hour and 6 hours) GV-injection.**


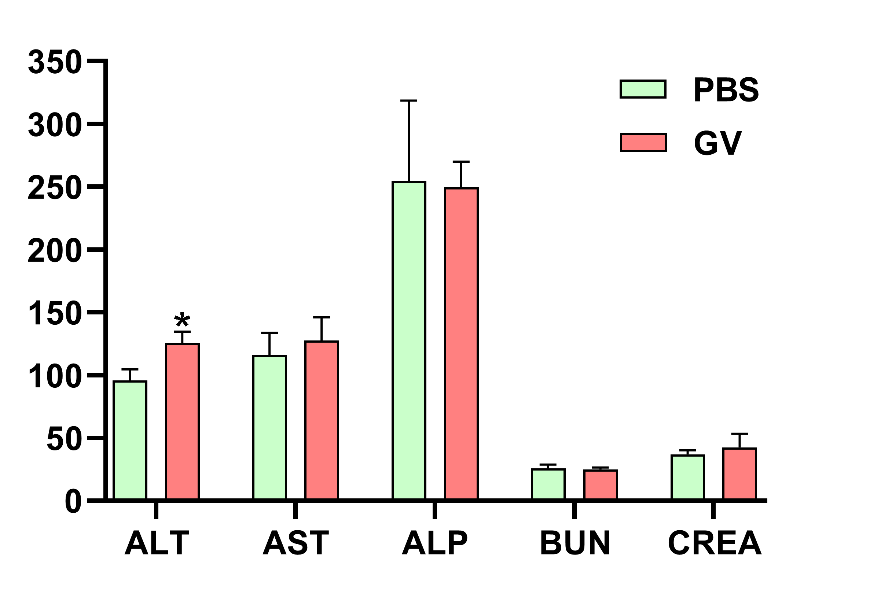

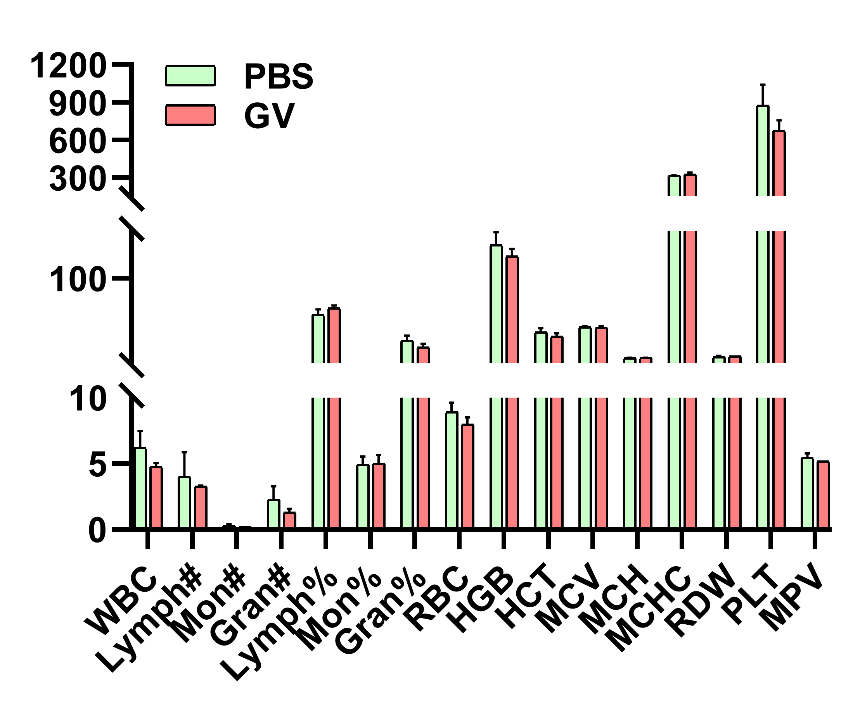


B

A

**sFigure 3. Blood biochemistry (A) and blood routine examinations (B) of C57 mice after receiving GV injection for 24 hours.** The unit of ALT, AST and ALP are U L-1; the units of BUN and CREA are mg dl-1 and μmol L-1, respectively; the units of WBC, Lymph#, Mon#, Gran# and PLT are 109 L-1, the units of Lymph%, Mon%, Gran%, HCT and RDW are %; the units of HGB and MCHC are g L-1; the units of MCV and MPV are fL; the units of RBC and MCH are 1012 L-1 and pg, respectively. Injection of PBS with same volume was set as control groups.


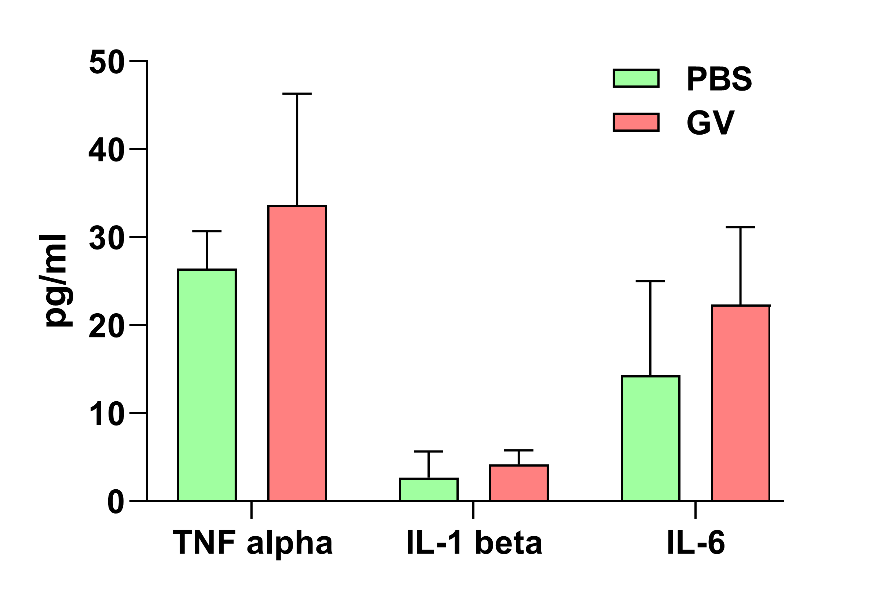


**sFigure 4. Characterization of representative inflammatory factors such as TNF-alpha, IL-1 beta and IL-6 after receiving intravenous injection with GVs for 24 hours.** Injection of PBS with same volume was set as control groups.


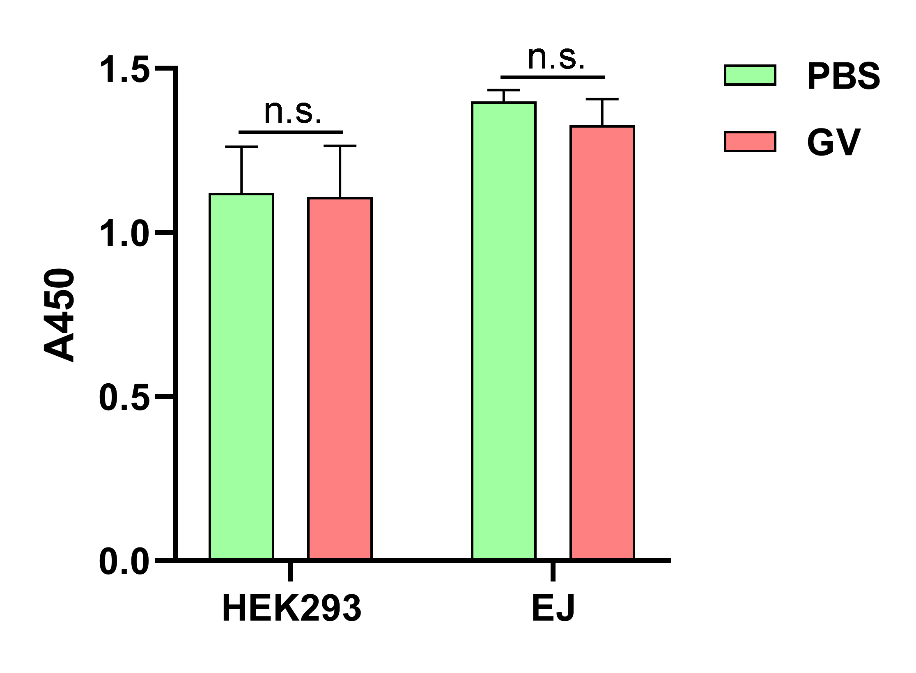


**sFigure 5. The cellular level safety of GVs.** HEK293 cells and EJ cells cultured in 96-well plate were incubated with 10 μl GVs (OD500=2) or PBS (control) for 24 hours prior to the detection of cell viability using the CCK-8 assay.
